# Supplementary material for: Effectiveness of remote care interventions: a systematic review informing the 2022 EULAR Points to Consider for remote care in rheumatic and musculoskeletal diseases
Source: HighWire-hosted journal article supplement (doi:10.1136/rmdopen-2022-002290), 2022-05-01
Supplement: rmdopen-2022-002290supp002_data_supplement.pdf [file rmdopen-2022-002290supp002_data_supplement.pdf]

## Supplementary material 2

### Search terms for the for the literature search in Medline, Embase and the Cochrane Library

#### Medline

- 1 exp Musculoskeletal Diseases/
- 2 ((muscular or musculo\$ or bone or cartilage or joint or rheumatic) adj2 (disease\$ or condition\$ or syndrome\$ or pain or abnormalit\$ or deformit\$ or instabilit\$)).tw.
- 3 (arthrit\$ or arthralg\$ or arthropath\$ or osteoarthritis\$ or spondyl\$ or Ankyl\$).tw.
- 4 (sPa or axSpa or PsA or jia).tw.
- 5 fibromyalg\$.tw.
- 6 gout\$.tw.
- 7 (systemic adj (sclerosis or lupus erythematosus)).tw.
- 8 (SSc or SLE).tw.
- 9 or/1-8
- 10 exp Telemedicine/
- 11 (telemonitor\$ or telemedicine or telehealth).tw.
- 12 ((remote or mobile or virtual) adj2 (health or medicine or evaluat\$ or assess\$ or consult\$ or care or appointment\$)).tw.
- 13 (mhealth or telehealth or ehealth).tw.
- 14 or/10-13
- 15 9 and 14
- 16 (animals not (humans and animals)).sh.
- 17 15 not 16

#### The Cochrane Library

- #1 MeSH descriptor: [Musculoskeletal Diseases] explode all trees
- #2 ((muscular OR musculo\* OR bone OR cartilage OR joint OR rheumatic) NEAR/2 (disease\* OR condition\* OR syndrome\* OR pain OR abnormalit\* OR deformit\* OR instabilit\*)):ti,ab
- #3 (arthrit\* or arthralg\* or arthropath\* or osteoarthritis\* or spondyl\* or Ankyl\*):ti,ab
- #4 (sPa or axSpa or PsA or jia):ti,ab
- #5 fibromyalg\*:ti,ab
- #6 gout\*:ti,ab
- #7 (systemic NEXT (sclerosis or "lupus erythematosus")):ti,ab
- #8 (SSc or SLE):ti,ab
- #9 #1 or #2 or #3 or #4 or #5 or #6 or #7 or #8
- #10 MeSH descriptor: [Telemedicine] explode all trees
- #11 ((remote or mobile or virtual) NEAR/2 (health or medicine or evaluat\* or assess\* or consult\* or care or appointment\*)):ti,ab
- #12 (mhealth or telehealth or ehealth):ti,ab
- #13 #10 OR #11 OR #12
- #14 #9 AND #13

#### Embase

- #1. 'musculoskeletal disease'/exp
- #2. ((muscular OR musculo\* OR bone OR cartilage OR joint OR rheumatic) NEAR/2 (disease\* OR condition\* OR syndrome\* OR pain OR abnormalit\* OR deformit\* OR instabilit\*)):ab,ti
- #3. arthrit\*:ab,ti OR arthralg\*:ab,ti OR arthropath\*:ab,ti OR osteoarthritis\*:ab,ti OR spondyl\*:ab,ti OR ankyl\*:ab,ti

- #4. spa:ab,ti OR axspa:ab,ti OR psa:ab,ti OR jia:ab,ti
- #5. fibromyalg\*:ab,ti
- #6. gout\*:ab,ti
- #7. 'systemic sclerosis':ab,ti OR 'systemic lupus erythematosus':ab,ti
- #8. ssc:ab,ti OR sle:ab,ti
- #9. #1 OR #2 OR #3 OR #4 OR #5 OR #6 OR #7 OR #8
- #10. 'telemedicine'/exp
- #11. telemonitor\*:ab,ti OR telemedicine:ab,ti OR telehealth:ab,ti
- #12. ((remote OR mobile OR virtual) NEAR/2 (health OR medicine OR evaluat\* OR assess\* OR consult\* OR care OR appointment\*)):ab,ti
- #13. mhealth:ab,ti OR telehealth:ab,ti OR ehealth:ab,ti
- #14. #10 OR #11 OR #12 OR #13
- #15. #9 AND #14
- #16. #10 AND #14 AND ([article]/lim OR [article in press]/lim OR [review]/lim) AND [humans]/lim
