# Supplementary material for: Effectiveness of remote care interventions: a systematic review informing the 2022 EULAR Points to Consider for remote care in rheumatic and musculoskeletal diseases
Source: HighWire-hosted journal article supplement (doi:10.1136/rmdopen-2022-002290), 2022-05-01
Supplement: rmdopen-2022-002290supp003_data_supplement.pdf [file rmdopen-2022-002290supp003_data_supplement.pdf]

## Online supplementary material S3

Table 1. Risk of bias assessment of randomised clinical trials (RoB 2).

| Author, year           | Randomisation process      | Deviations from intended interventions | Missing outcome data       | Measurement of the outcome  | Selection of the reported result | Overall Bias  |
|------------------------|----------------------------|----------------------------------------|----------------------------|-----------------------------|----------------------------------|---------------|
| Amorim 2019            | Low                        | Low                                    | Some concerns <sup>1</sup> | Some concerns <sup>2</sup>  | Low                              | Some concerns |
| Azma 2017              | Some concerns <sup>3</sup> | Low                                    | Low                        | High <sup>4</sup>           | Low                              | High          |
| Bennell 2017           | Low                        | Low                                    | Low                        | Low                         | Some concerns <sup>5</sup>       | Some concerns |
| Berdal 2018            | Low                        | Low                                    | Low                        | Low                         | Low                              | Low           |
| Cuperus 2015           | Low                        | Low                                    | Low                        | Low                         | Low                              | Low           |
| Cuperus 2016           | Low                        | Low                                    | Low                        | Low                         | High <sup>6</sup>                | High          |
| Thurah 2017            | Low                        | Low                                    | Low                        | Low                         | Low                              | Low           |
| Friesen 2017           | Low                        | Low                                    | Low                        | Low                         | Low                              | Low           |
| Geraghty 2018          | Low                        | Low                                    | Low                        | Low                         | Some concerns <sup>7</sup>       | Some concerns |
| Gossec 2019            | Some concerns <sup>8</sup> | Low                                    | Low                        | Low                         | Low                              | Some concerns |
| Hinman 2019            | Low                        | Low                                    | Low                        | Low                         | Low                              | Low           |
| Khan 2020              | Low                        | Low                                    | High <sup>9</sup>          | Low                         | High <sup>10</sup>               | High          |
| Kloek, Bossen 2018     | Low                        | Low                                    | High <sup>11</sup>         | Low                         | High <sup>12</sup>               | High          |
| Kloek, van Dongen 2018 | Low                        | Low                                    | High <sup>13</sup>         | Low                         | Low                              | High          |
| Taylor-Gjevre 2017     | Low                        | Low                                    | High <sup>14</sup>         | Low                         | Low                              | High          |
| Salaffi 2016           | Low                        | High <sup>15</sup>                     | Low                        | Some concerns <sup>16</sup> | Low                              | High          |
| Solomon 2012           | Low                        | Low                                    | Low                        | High <sup>17</sup>          | Low                              | High          |

<sup>1</sup>10/34 patients in control group dropped out. Their responses to the outcomes may have influenced the effect size; <sup>2</sup>Little info how outcomes were assessed and by whom. Maybe only electronically but it is not clearly written.; <sup>3</sup>Nearly no information on the randomization process at all; <sup>4</sup>Outcome assessor was not blinded; <sup>5</sup>Multiple ways to measure pain, function and physical activity were used and some ways showed significant results while others did not; <sup>6</sup>Cost utility was assessed using different scales in for the same outcome category. Conclusions were drawn as one of these scales reported a statistical significance.; <sup>7</sup>There is no info on possible protocol changes. Multiple quantitative Data that was measured but results were not shown comparing the groups; <sup>8</sup>Little to no information on the randomization process; <sup>9</sup>In the per protocol analysis a considerable amount of patients was lost; <sup>10</sup>Data were only statistically significant in the per protocol group not in the IIT group. Conclusions were drawn only on behalf of the per protocol analysis; <sup>11</sup>At 3 month follow up approximately 15% and at 12-month follow up 35% of patients were lost to follow up; <sup>12</sup>Multiple outcomes for the same outcomes' category. However, the majority of results was insignificant between the groups; <sup>13</sup>At 3 month follow up approximately 15% and at 12-month follow up 35% of patients were lost to follow up; <sup>14</sup>High drop-out rates, especially in the telehealth group; <sup>15</sup>The telehealth group had an overall stricter therapy algorithm than the control group; <sup>16</sup>unclear who the outcome assessor was; <sup>17</sup>No information on the outcome assessors.

**Table 2.** Risk of bias assessment of non-randomised studies of the effects of interventions (ROBINS-I tool).

| Author, year        | Bias due to confounding | Bias in selection of participants into the study | Bias in classification of interventions | Bias due to deviations from intended interventions | Bias due to missing data | Bias in measurement of outcomes | Bias in selection of the reported results | Overall Bias |
|---------------------|-------------------------|--------------------------------------------------|-----------------------------------------|----------------------------------------------------|--------------------------|---------------------------------|-------------------------------------------|--------------|
| Ammerlaan, 2014     | Serious <sup>1</sup>    | Low                                              | Low                                     | Moderate <sup>2</sup>                              | Low                      | Serious <sup>3</sup>            | Moderate <sup>4</sup>                     | Serious      |
| Kennedy 2017        | Moderate <sup>5</sup>   | Low                                              | Low                                     | Low                                                | Serious <sup>6</sup>     | NI <sup>7</sup>                 | Low                                       | Serious      |
| Legget, 2000        | Moderate <sup>8</sup>   | Moderate <sup>9</sup>                            | Low                                     | Low                                                | Low                      | Low                             | Low                                       | Moderate     |
| Nero, 2017          | Serious <sup>10</sup>   | Moderate <sup>11</sup>                           | Moderate <sup>12</sup>                  | Moderate <sup>13</sup>                             | Serious <sup>14</sup>    | Moderate <sup>15</sup>          | Low                                       | Serious      |
| Nguyen-Oghalai 2018 | Moderate <sup>16</sup>  | Low                                              | Low                                     | Low                                                | Low                      | Low                             | Low                                       | Moderate     |
| Wood, 2019          | Low                     | Low                                              | Moderate <sup>17</sup>                  | Low                                                | Low                      | Serious <sup>18</sup>           | Low                                       | Serious      |
| Peterson, 2018      | Low                     | Low                                              | Moderate <sup>19</sup>                  | Low                                                | Low                      | Moderate <sup>20</sup>          | Low                                       | Moderate     |

<sup>1</sup>Disease activity or other confounding variables were not taken into consideration; <sup>2</sup>Little to no info on the comparator group; <sup>3</sup>The outcomes were assessed in different ways between the groups; <sup>4</sup>Multiple sub outcomes resulted in one general outcome; <sup>5</sup>Confounding variables like different hospitals who recruited patients were not controlled for; <sup>6</sup>Especially at the 6 month follow up data was only available for 62% of patients. Missing data was found mainly in one group; <sup>7</sup>No info whether patients (who assessed the outcome themselves) were aware of the groups; <sup>8</sup>There is no info on the time to the last meeting. The time might have influenced patient satisfaction; <sup>9</sup>Little to no info on the patient selection; <sup>10</sup>Other reasons for pain not assessed. Also different treatment durations; <sup>11</sup>Little to no info on the patient selection; <sup>12</sup>Little to no info on patient classification; <sup>13</sup>Little to no info on the comparator group; <sup>14</sup>25% of patients lost to follow up; <sup>15</sup>Little to no info on how the outcome was assessed in the comparator group; <sup>16</sup>Factors like bad connection were not considered in the analysis; <sup>17</sup>Little information on the intervention; <sup>18</sup>unclear whether methods of outcome assessment were comparable across intervention groups; <sup>19</sup>Little information who performed intervention; <sup>20</sup>no info on the outcome assessors.

**Table 3.** Risk of bias assessment of cross sectional studies (JBI Critical Appraisal Checklist for Analytical Cross Sectional Studies)

| Author, year           | Were the criteria for inclusion in the sample clearly defined? | Were the study subjects and the setting described in detail? | Was the exposure measured in a valid and reliable way? | Were objective, standard criteria used for measurement of the condition? | Were confounding factors identified? | Were strategies to deal with confounding factors stated? | Were the outcomes measured in a valid and reliable way? | Was appropriate statistical analysis used? |
|------------------------|----------------------------------------------------------------|--------------------------------------------------------------|--------------------------------------------------------|--------------------------------------------------------------------------|--------------------------------------|----------------------------------------------------------|---------------------------------------------------------|--------------------------------------------|
| Bullock et al. (2017)  | Yes                                                            | Yes                                                          | Yes                                                    | Yes                                                                      | Unclear                              | Unclear                                                  | Yes                                                     | Yes                                        |
| Dejaco et al. (2020)   | Yes                                                            | Yes                                                          | Yes                                                    | Yes                                                                      | Unclear                              | Unclear                                                  | Yes                                                     | Yes                                        |
| Ferwerda et al. (2013) | Yes                                                            | Yes                                                          | Yes                                                    | Yes                                                                      | Unclear                              | Unclear                                                  | Yes                                                     | Yes                                        |
| Lawford et al. (2017)  | Yes                                                            | Yes                                                          | Yes                                                    | Yes                                                                      | Unclear                              | Unclear                                                  | Yes                                                     | Yes                                        |
| Lawford et al. (2018)  | Yes                                                            | Yes                                                          | Yes                                                    | Yes                                                                      | Unclear                              | Unclear                                                  | Yes                                                     | Yes                                        |
| Magnol et al. (2021)   | Yes                                                            | Yes                                                          | Yes                                                    | Yes                                                                      | Unclear                              | Yes                                                      | Yes                                                     | Yes                                        |
| Opinc et al. (2020)    | Yes                                                            | Yes                                                          | Yes                                                    | Yes                                                                      | Unclear                              | Unclear                                                  | Yes                                                     | Yes                                        |
| Kessler et al (2016)   | Yes                                                            | Yes                                                          | Yes                                                    | Yes                                                                      | Unclear                              | Unclear                                                  | Yes                                                     | Yes                                        |

**Table 4.** Risk of bias assessment of qualitative studies studies (JBI Critical Appraisal Checklist for qualitative research)

| Author, year                 | Is there congruity between the stated philosophical perspective and the research methodology? | Is there congruity between the research methodology and the research question or objectives? | Is there congruity between the research methodology and the methods used to collect data? | Is there congruity between the research methodology and the representation and analysis of data? | Is there congruity between the research methodology and the interpretation of results? | Is there a statement locating the researcher culturally or theoretically? | Is the influence of the researcher on the research, and vice-versa, addressed? | Are participants, and their voices, adequately represented? | Is the research ethical according to current criteria or, for recent studies, and is there evidence of ethical approval by an appropriate body? | Do the conclusions drawn in the research report flow from the analysis, or interpretation, of the data? |
|------------------------------|-----------------------------------------------------------------------------------------------|----------------------------------------------------------------------------------------------|-------------------------------------------------------------------------------------------|--------------------------------------------------------------------------------------------------|----------------------------------------------------------------------------------------|---------------------------------------------------------------------------|--------------------------------------------------------------------------------|-------------------------------------------------------------|-------------------------------------------------------------------------------------------------------------------------------------------------|---------------------------------------------------------------------------------------------------------|
| Barber et al. (2019)         | Unclear                                                                                       | Yes                                                                                          | Yes                                                                                       | Yes                                                                                              | Yes                                                                                    | Unclear                                                                   | Yes                                                                            | Yes                                                         | Yes                                                                                                                                             | Yes                                                                                                     |
| Hinman et al. (2017)         | Yes                                                                                           | Yes                                                                                          | Yes                                                                                       | Yes                                                                                              | Yes                                                                                    | Yes                                                                       | Yes                                                                            | Yes                                                         | Yes                                                                                                                                             | Yes                                                                                                     |
| Knudsen et al. (2018)        | Yes                                                                                           | Yes                                                                                          | Yes                                                                                       | Yes                                                                                              | Yes                                                                                    | Yes                                                                       | Yes                                                                            | Yes                                                         | Yes                                                                                                                                             | Yes                                                                                                     |
| Mathijssen et al. (2018)     | Unclear                                                                                       | Yes                                                                                          | Yes                                                                                       | Yes                                                                                              | Yes                                                                                    | Unclear                                                                   | Yes                                                                            | Yes                                                         | Yes                                                                                                                                             | Yes                                                                                                     |
| Navarro-Millan et al. (2019) | Yes                                                                                           | Yes                                                                                          | Yes                                                                                       | Yes                                                                                              | Yes                                                                                    | Yes                                                                       | Yes                                                                            | Yes                                                         | Yes                                                                                                                                             | Yes                                                                                                     |
